# Supplementary material for: Concrete vs. Ceramic Blocks: Environmental Impact Evaluation Considering a Country-Level Approach
Source: MDPI journal article supplement (doi:10.3390/world2040030), 2021-11-17
Supplement: s1 [file s1]

Archive with 1 entries (1 files):
- world-1428942-SI.pdf
