# Supplementary material for: Concrete vs. Ceramic Blocks: Environmental Impact Evaluation Considering a Country-Level Approach
Source: MDPI journal article supplement (doi:10.3390/world2040030), 2021-11-17
Supplement: s1 [file s1 › world-1428942-SI.pdf]

## SUPPLEMENTARY MATERIAL

The Supplementary Material is divided in two items (SMI and SMII).

### SMI - Materials and Methods

Part of data used in Materias and Methods are presented in Figure S1 and Tables S1-S3.

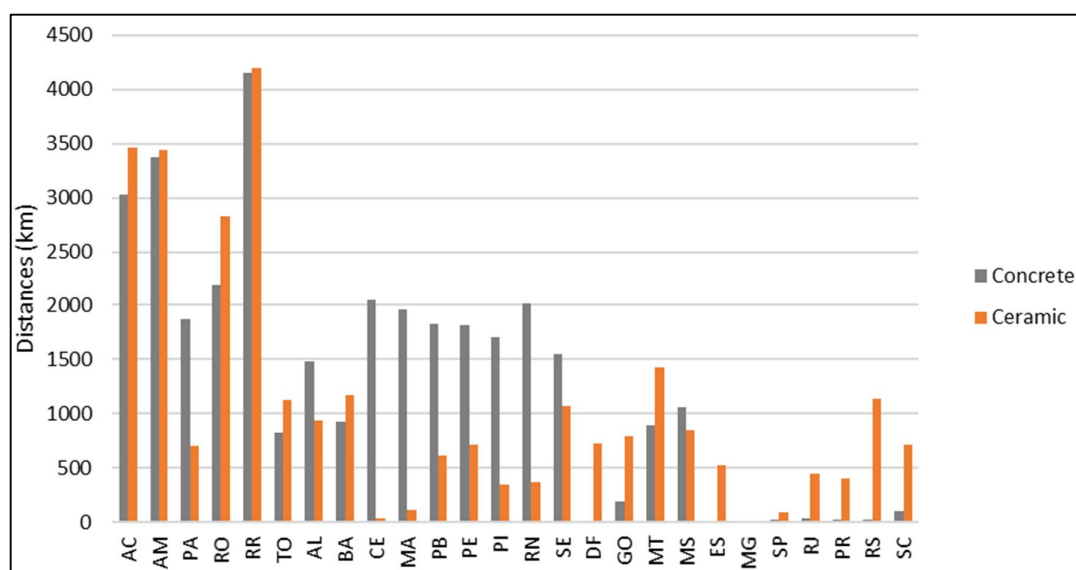

**Figure S1.** Transportation distances of concrete and ceramic blocks.

**Table S1.** Datasets used in the Life cycle GHG emissions inventory.

| Materials production             |      |              |                                                                                                         |
|----------------------------------|------|--------------|---------------------------------------------------------------------------------------------------------|
| Concrete block (kg)              |      |              | Souza et al. [27]                                                                                       |
| Ceramic block - Wood chips (kg)  |      |              | Souza et al. [27]                                                                                       |
| Ceramic block - Natural gas (kg) |      |              | Clay brick {RoW}. Electricity change for the BR mix. Ecoinvent v. 3.3                                   |
| Transportation                   |      |              |                                                                                                         |
| Transport (t.km)                 | 100% | Default      | Carried 100%: 1 tkm Transport, truck 10-20t, EURO3, 100%LF, default/GLO Mass; Ecoinvent v. 3.3          |
| Transport return (t.km)          | 100% | Empty        | Empty return 100%: 1 tkm Transport, truck 10-20t, EURO3, 100%LF, empty return/GLO Mas. Ecoinvent v. 3.3 |
| Transport (t.km)                 | 80%  | Default      | Carried 80%: 1 tkm Transport, truck 10-20t, EURO3, 80%LF, default/GLO. Ecoinvent v. 3.3                 |
| Transport (t.km)                 | 80%  | Empty return | Empty return 80%: 1 tkm Transport, truck 10-20t, EURO3, 80%LF, empty return/GLO.Ecoinvent v. 3.3        |

|                  |     |              |                                                                                                   |
|------------------|-----|--------------|---------------------------------------------------------------------------------------------------|
| Transport (t.km) | 50% | Default      | Carried 50%: 1 tkm Transport, truck 10-20t, EURO3, 80%LF, default/GLO. Ecoinvent v. 3.3           |
| Transport (t.km) | 50% | Empty return | Empty return 50%: 1 tkm Transport, truck 10-20t, EURO3, 80%LF, empty return/GLO. Ecoinvent v. 3.3 |

**Table S2.** Input data for Housing Deficit calculation.

| % of Houses type                             |           |           |           |           |           |           |
|----------------------------------------------|-----------|-----------|-----------|-----------|-----------|-----------|
| Years                                        | 2016-2020 | 2021-2025 | 2026-2030 | 2031-2035 | 2036-2040 | 2041-2045 |
| B1 - Building type 1                         | 38%       | 35%       | 30%       | 25%       | 22%       | 20%       |
| B2 - Building type 2                         | 40%       | 42%       | 41%       | 41%       | 41%       | 42%       |
| B3 - Building type 3                         | 22%       | 23%       | 29%       | 34%       | 37%       | 38%       |
| Wall area of Houses type                     |           |           |           |           |           |           |
| B1 (m <sup>2</sup> /house)                   | 98,9      | 98,9      | 98,9      | 98,9      | 98,9      | 98,9      |
| B2 (m <sup>2</sup> /house)                   | 154,9     | 154,9     | 154,9     | 154,9     | 154,9     | 154,9     |
| B3 (m <sup>2</sup> /house)                   | 266,1     | 266,1     | 266,1     | 266,1     | 266,1     | 266,1     |
| Equivalent wall area (m <sup>2</sup> /house) | 158,084   | 160,876   | 170,348   | 178,708   | 183,724   | 185,956   |

## SMII - Results

Part of the results are presented in Figures S2-S37.

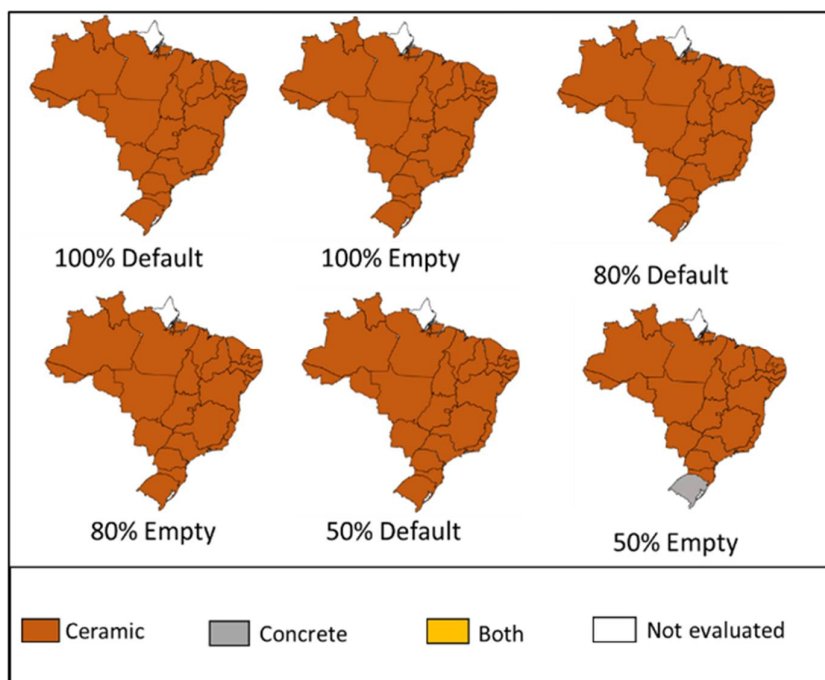

**Figure S2.** Climate Change Impact – comparison between concrete and ceramic blocks. Orange = Ceramic blocks are the most advantageous; Gray = Concrete blocks are the most advantageous; Yellow = Less than 5% difference between ceramic and concrete blocks.

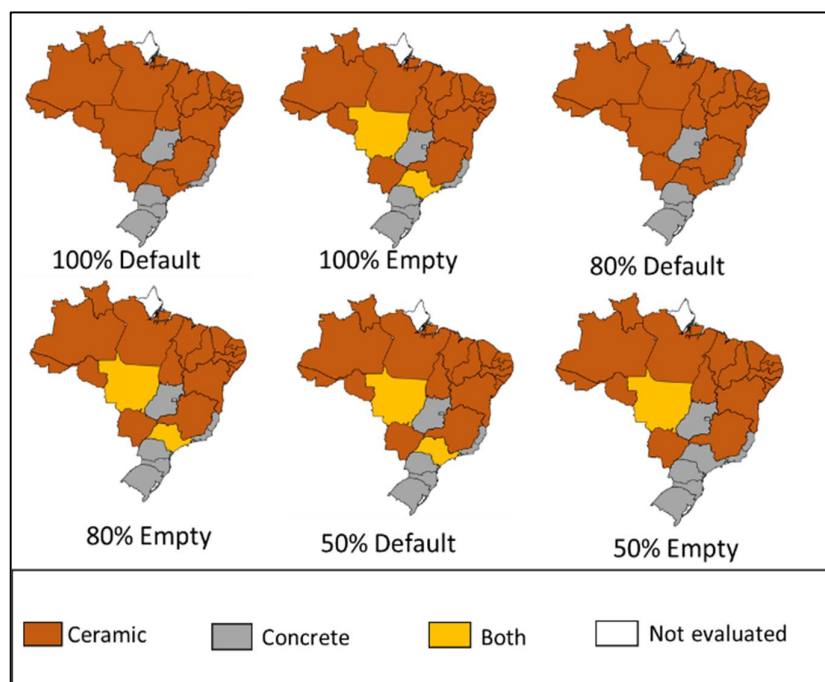

**Figure S3.** Human Health Impact – comparison between concrete and ceramic blocks. Orange = Ceramic blocks are the most advantageous; Gray = Concrete blocks are the most advantageous; Yellow = Less than 5% difference between ceramic and concrete blocks.

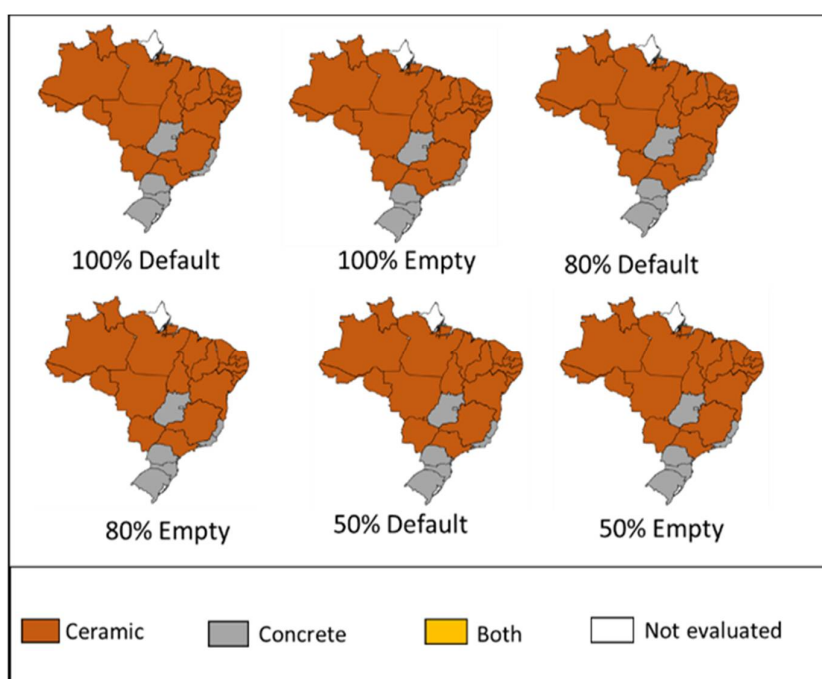

**Figure S4.** Ecosystem Quality Impact – comparison between concrete and ceramic blocks. Orange = Ceramic blocks are the most advantageous; Gray = Concrete blocks are the most advantageous; Yellow = Less than 5% difference between ceramic and concrete blocks.

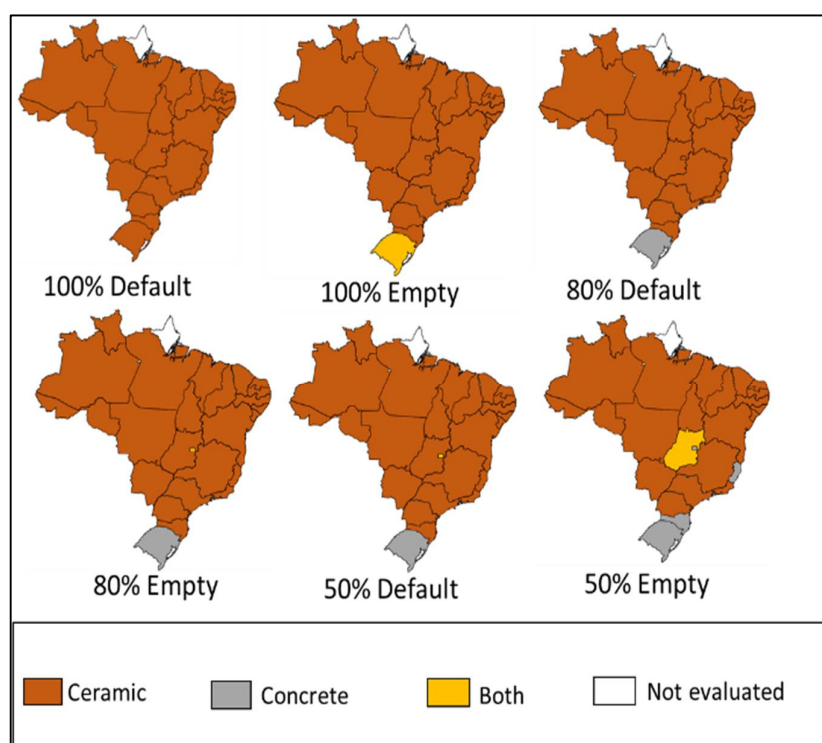

**Figure S5.** Resources Depletion Impact – comparison between concrete and ceramic blocks. Orange = Ceramic blocks are the most advantageous; Gray = Concrete blocks are the most advantageous; Yellow = Less than 5% difference between ceramic and concrete blocks

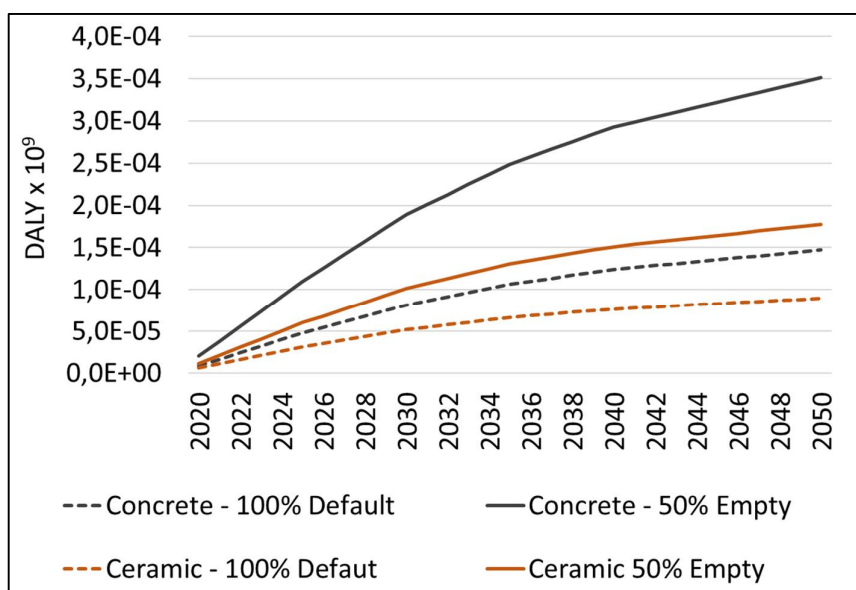

**Figure S6.** Human health impact considering the housing deficit projection.

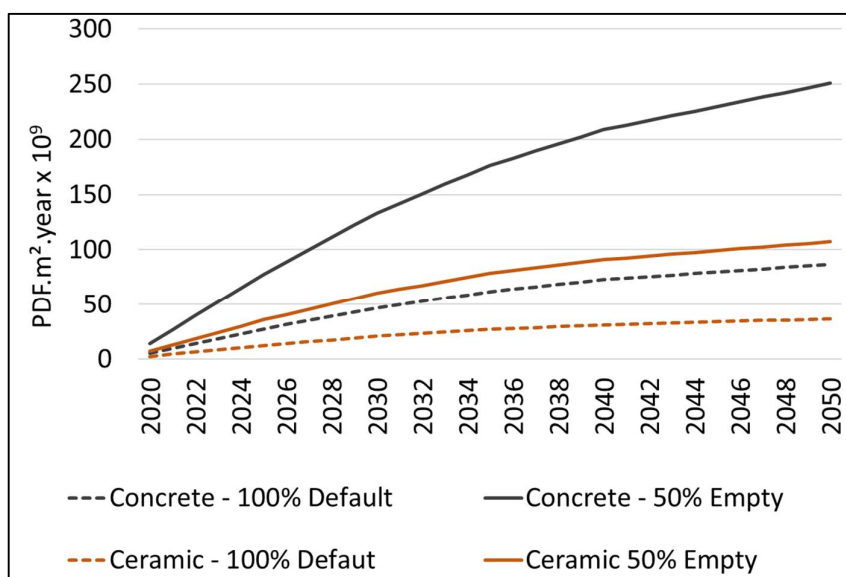

**Figure S7.** Ecosystem quality impact considering the housing deficit projection.

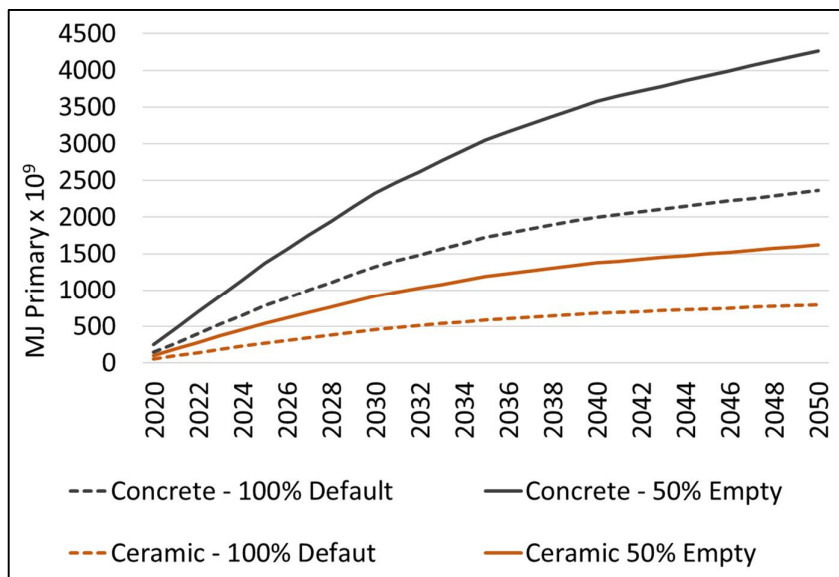

Figure S8. Resources depletion impact considering the housing deficit projection.

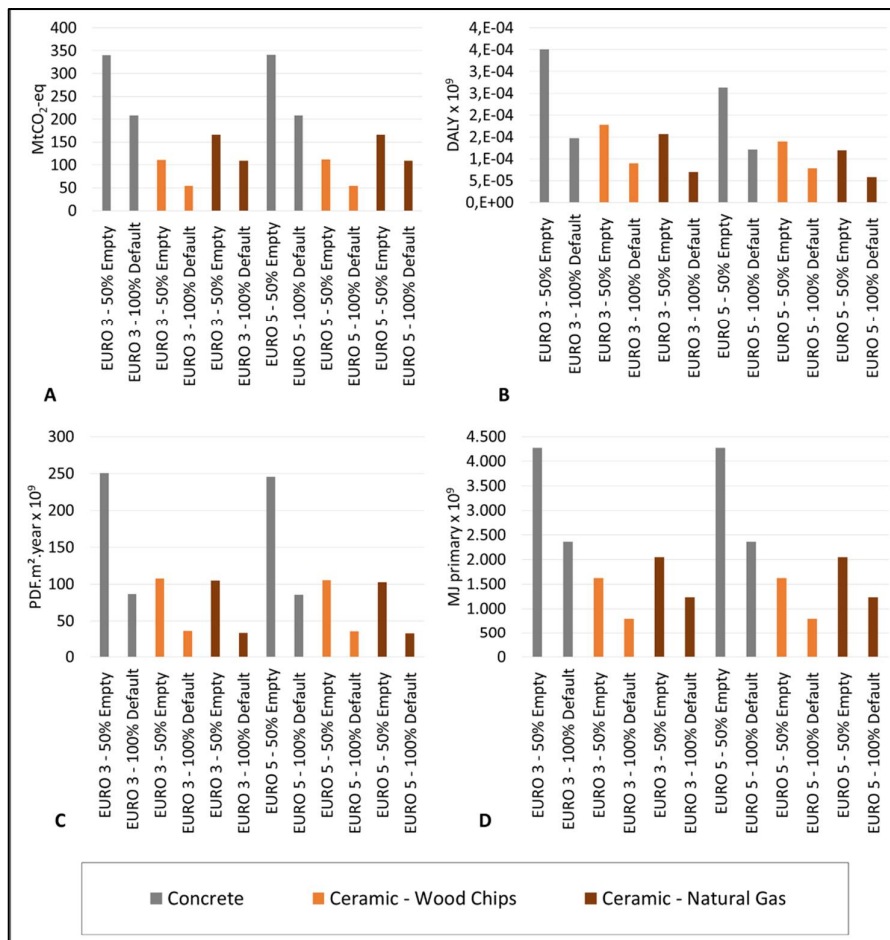

Figure S9. Detailed results of all impact categories considering the housing deficit for different sensitivity analysis scenarios. Results are normalized by Concrete blocks – EURO 3 – 50% Empty scenario. (A) Climate Change (B) Human Health (C) Ecosystem Quality (D) Resources Depletion.
